# Supplementary material for: TRAIL receptor agonists convert the response of breast cancer cells to ONC201 from anti-proliferative to apoptotic
Source: PubMed Central journal article supplement (PMC7584235; doi:10.18632/oncotarget.27773), 2020-10-20
Supplement: oncotarget-11-3753-s001.pdf [file oncotarget-11-3753-s001.pdf]

# TRAIL receptor agonists convert the response of breast cancer cells to ONC201 from anti-proliferative to apoptotic

## SUPPLEMENTARY MATERIALS

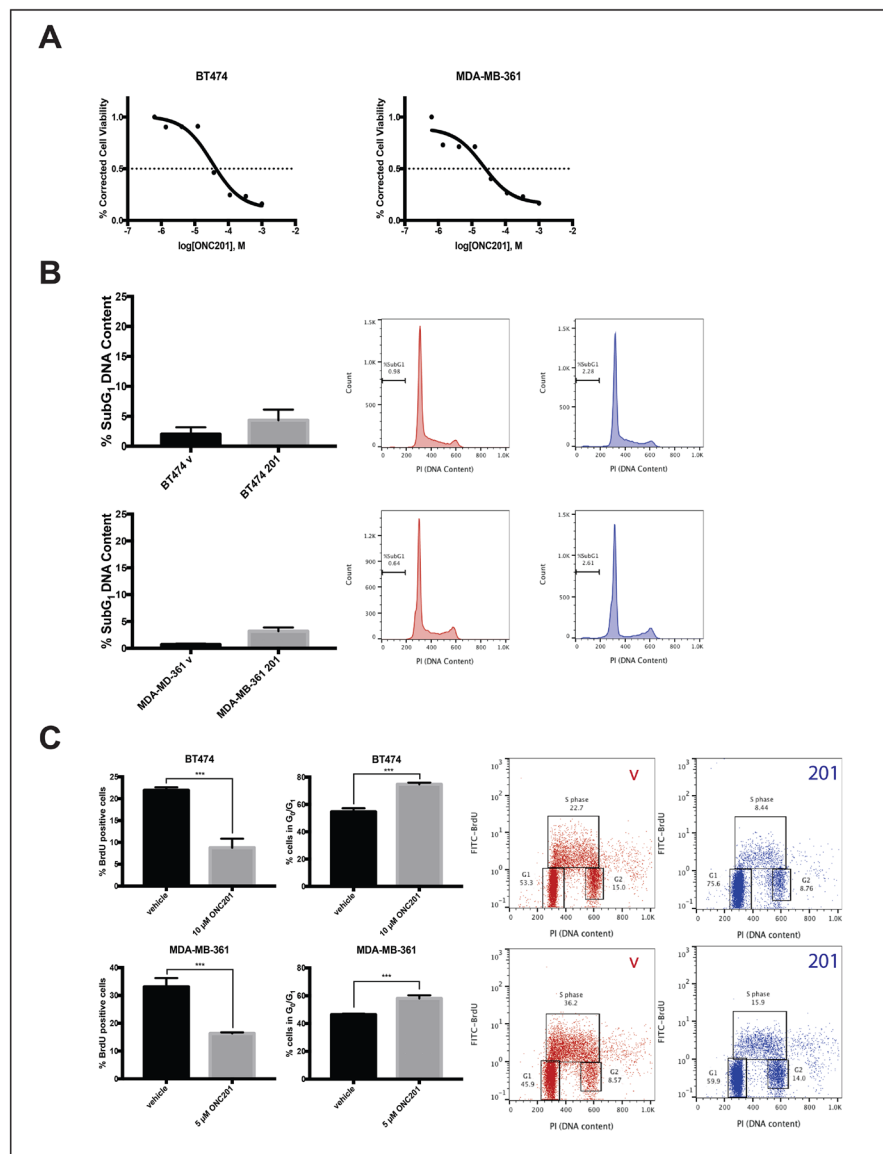

**Supplementary Figure 1: ONC201 inhibits the proliferation but does not induce apoptosis in BT474 and MDA-MB-361 TRAIL-resistant non-TNBC cells.** (A) Dose response curves for cells treated with varying concentrations of ONC201 for 72 hours were generated. Cell viability was determined using CellTiterGlo reagent. (B) Cells were treated with a vehicle control or approximate  $GI_{50}$  doses of ONC201 for 72 hours and stained with propidium iodide. Flow cytometric analysis of the cells was used to determine the percentage of cells with subG<sub>1</sub> DNA content. (C) Cells were treated with a vehicle control or approximate  $GI_{50}$  doses of ONC201 for 48 hours, then pulsed with BrdU for 30 minutes. BrdU-PI staining was performed and the % BrdU positive cells quantitated using flow cytometric analysis. Representative dot plots are shown. ns:  $p > 0.05$ ; \* $p \leq 0.05$ , \*\* $p \leq 0.01$ , \*\*\* $p \leq 0.001$ , \*\*\*\* $p \leq 0.0001$ .

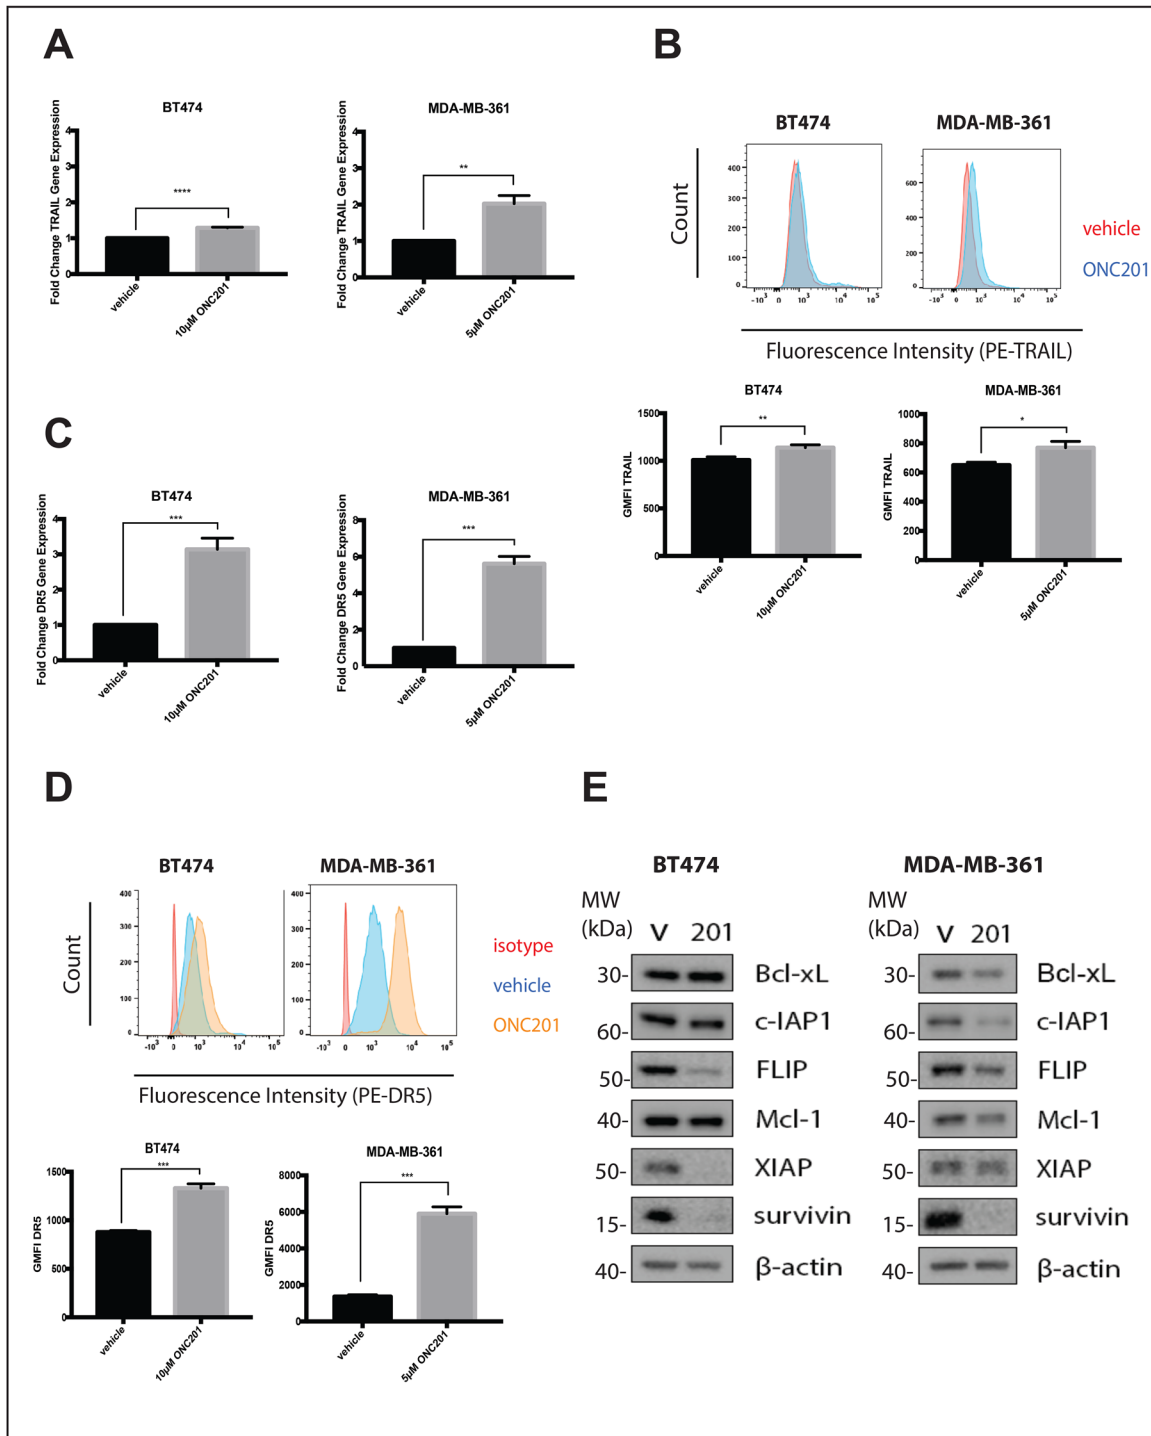

**Supplementary Figure 2: ONC201 treated BT474 and MDA-MB-361 non-TNBC cells increase TRAIL expression and are primed to undergo TRAIL-dependent apoptosis.** (A) Cells were treated with a vehicle control or approximate  $GI_{50}$  doses of ONC201 for 48 hours and qRT-PCR was used to determine the fold change in TRAIL gene expression. (B) Cells were treated with a vehicle control or approximate  $GI_{50}$  doses of ONC201 for 72 hours and then stained with an anti-TRAIL antibody. The geometric mean fluorescence intensity was determined using flow cytometric analysis. Representative histograms show the staining. (C) Cells were treated with a vehicle control or approximate  $GI_{50}$  doses of ONC201 for 48 hours and qRT-PCR was used to determine the fold change in DR5 gene expression. (D) Cells were treated with a vehicle control or approximate  $GI_{50}$  doses of ONC201 for 72 hours and then stained with an isotype control or an anti-DR5 antibody. The geometric mean fluorescence intensity was determined using flow cytometric analysis. Representative histograms show the staining. (E) Cells were treated with a vehicle control or  $GI_{50}$  doses of ONC201 for 72 hours. Western blot analysis used to assess expression of anti-apoptotic proteins. ns:  $p > 0.05$ ; \* $p \leq 0.05$ , \*\* $p \leq 0.01$ , \*\*\* $p \leq 0.001$ , \*\*\*\* $p \leq 0.0001$ .

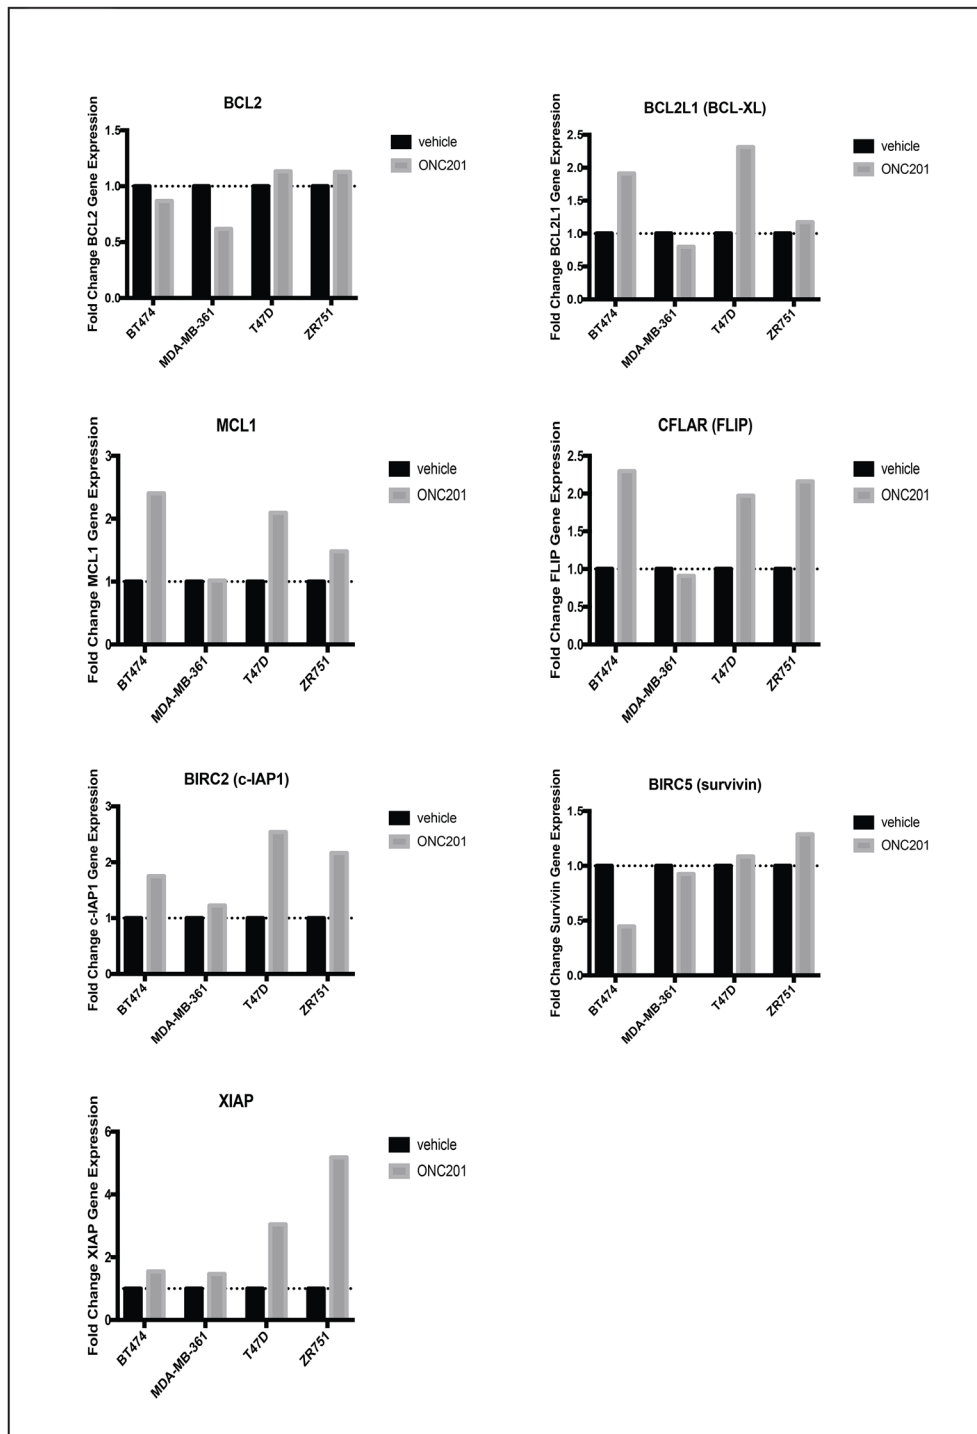

**Supplementary Figure 3: The effects of ONC201 treatment on anti-apoptotic gene expression do not correlate with the compound's effects on protein levels.** Cells were treated with a vehicle control or approximate  $GI_{50}$  doses of ONC201 for 48 hours and qRT-PCR was used to determine the fold change in anti-apoptotic gene expression.

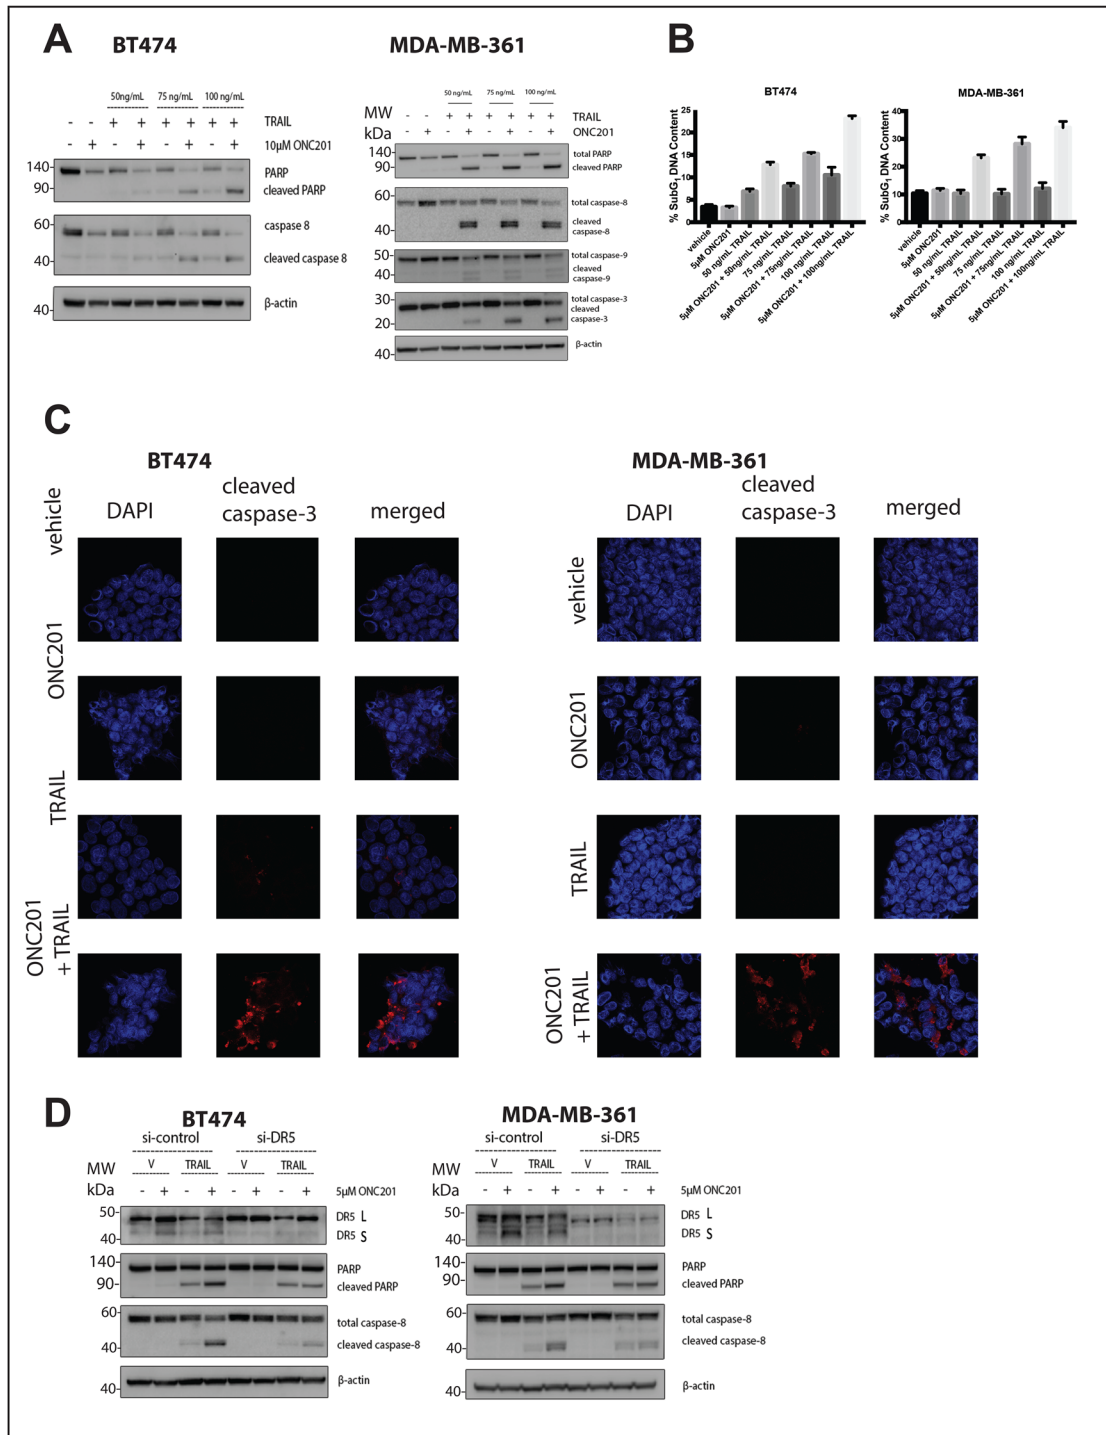

**Supplementary Figure 4: Addition of rhTRAIL converts the response of BT474 and MDA-MB-361 breast cancer cells to ONC201 from anti-proliferative to pro-apoptotic in a DR5-dependent manner.** (A) BT474 and MDA-MB-361 cells were treated with a vehicle control or  $G_{1/50}$  doses of ONC201 for 72 hours. Recombinant human TRAIL (rhTRAIL) was added for 4 hours and the induction of cell death was assessed using western blot. (B) BT474 and MDA-MB-361 cells were treated as above and stained with propidium iodide. Flow cytometric analysis of the cells was used to determine the percentage of cells with subG<sub>1</sub> DNA content. (C) BT474 and MDA-MB-361 cells were transfected with a scrambled siRNA or a DR5-targeting siRNA for 18 hours, then treated with a vehicle control or  $G_{1/50}$  doses of ONC201 for 48 hours. (D) Recombinant human TRAIL (rhTRAIL) was added for 4 hours and western blot analysis used to assess induction of cell death.



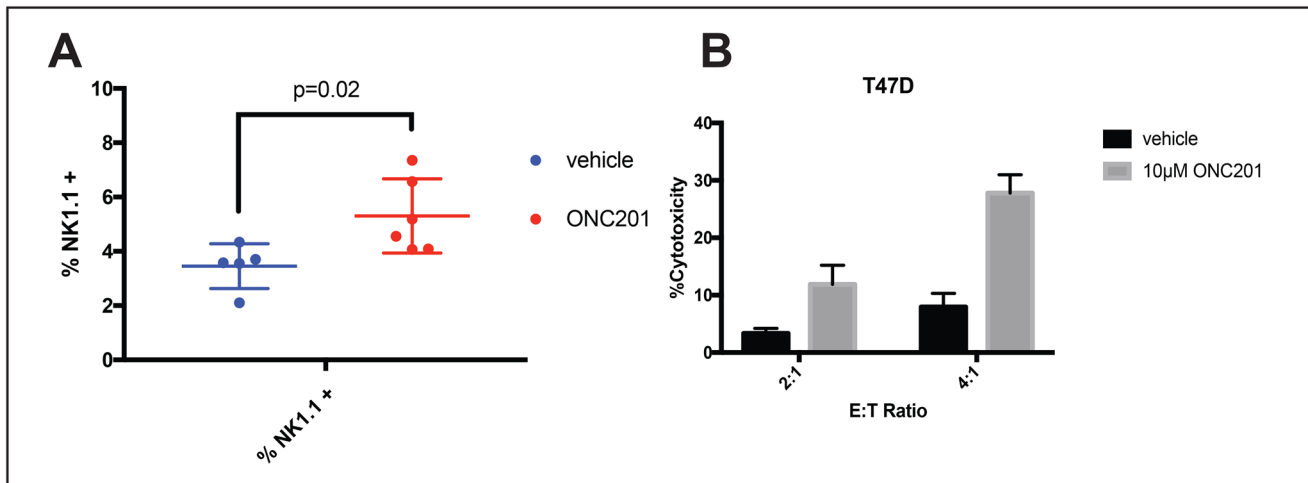

**Supplementary Figure 5: NK cells exhibit greater cytotoxicity against ONC201-treated cells compared with vehicle treated cells.** (A) Flow cytometric analysis of tumor infiltrating lymphocytes (TILs) from mice treated with a vehicle control or 100 mg/kg ONC201 orally twice weekly for 3 weeks. The percent of CD19-CD3-NK1.1+ lymphocytes are graphed. (B) Cell based cytotoxicity assay was used to quantify killing of tumor cells by NK92 cells. ns:  $p > 0.05$ ; \* $p \leq 0.05$ , \*\* $p \leq 0.01$ , \*\*\* $p \leq 0.001$ , \*\*\*\* $p \leq 0.0001$ .

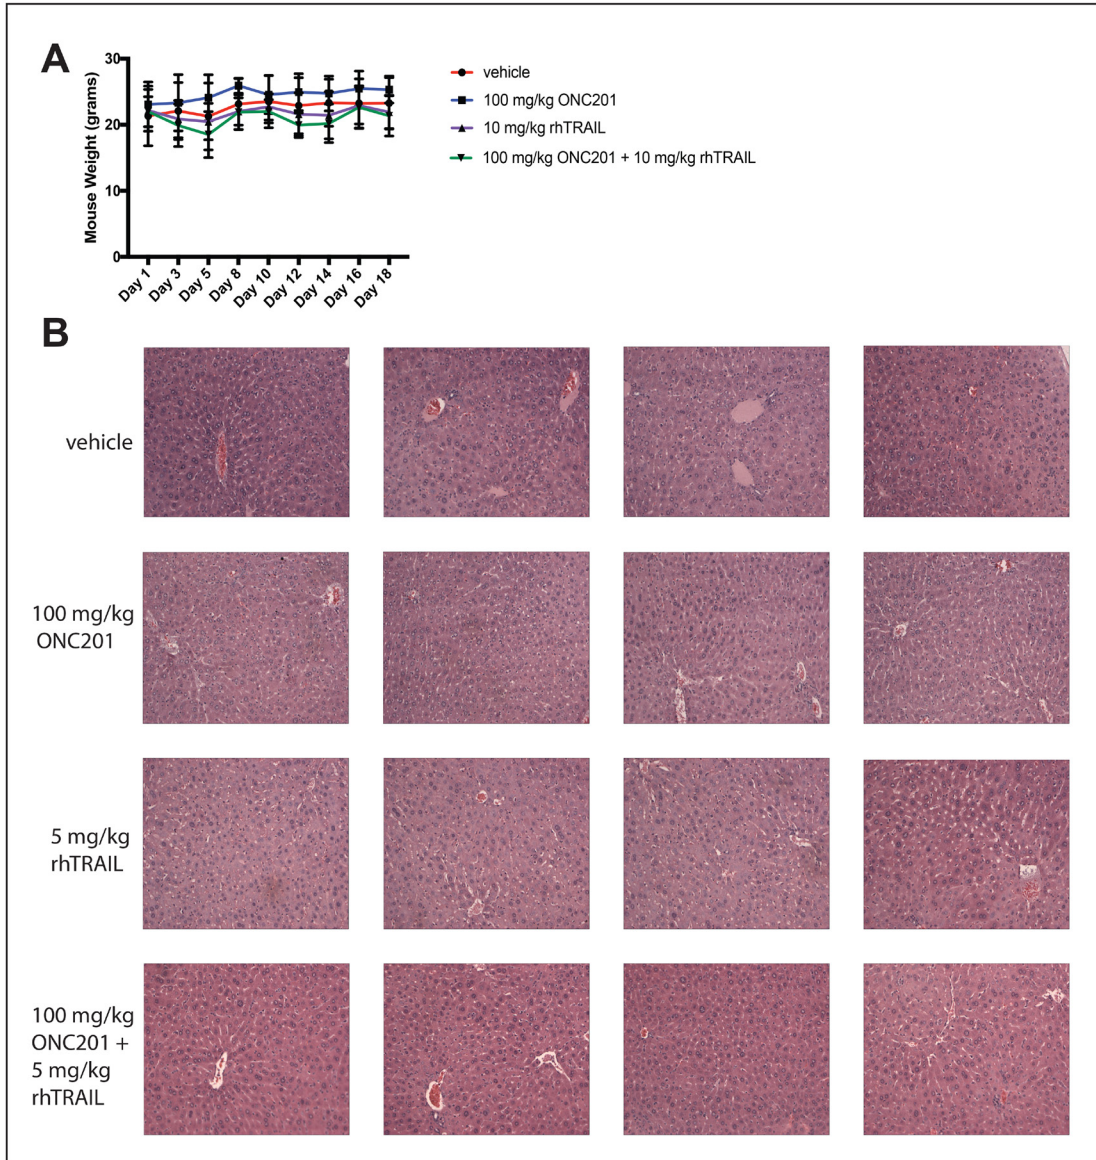

**Supplementary Figure 6: Safety of ONC201 and rhTRAIL *in vivo*.** (A) Mice bearing MDA-MB-361 xenograft tumors were treated weekly with a vehicle control, 100 mg/kg ONC201 orally, 10 mg/kg rhTRAIL intravenously, or a combination of ONC201 and rhTRAIL. rhTRAIL was given 72 hours after ONC201. Mouse weights were measured over time. (B) Liver sections from mice bearing MDA-MB-361 xenograft tumors treated with a vehicle control, 100 mg/kg ONC201 orally, 5 mg/kg rhTRAIL intravenously, or a combination of ONC201 and rhTRAIL for three cycles were stained with H&E 24 hours after treatment.

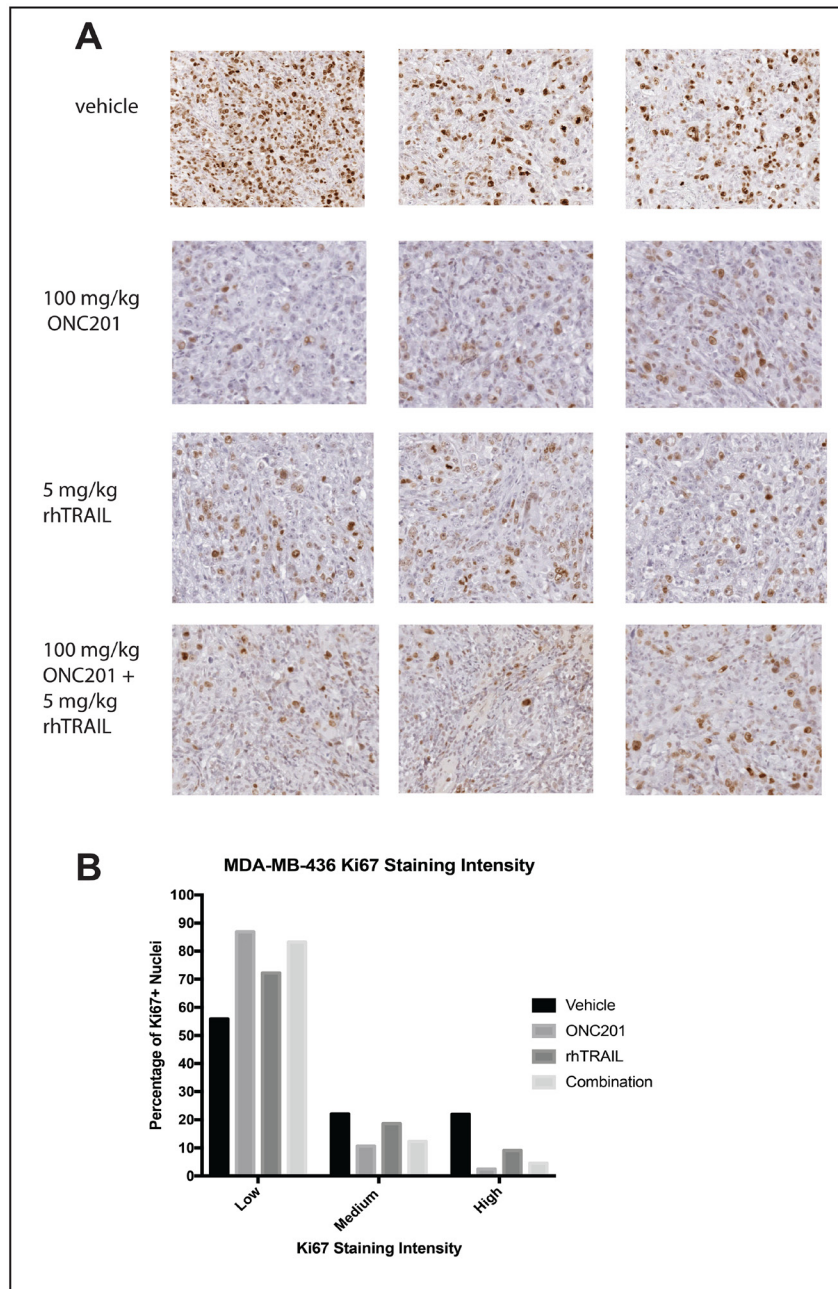

**Supplementary Figure 7: Ki67 staining in MDA-MB-436.** (A) Mice bearing MDA-MB-436 xenograft tumors were treated as treated with a vehicle control, 100 mg/kg ONC201 orally, 5 mg/kg rhTRAIL intravenously, or a combination of ONC201 and rhTRAIL for three cycles. 7 days after final TRAIL dose tumor sections were fixed and stained for Ki67. (B) Percentage of Ki67 positive nuclei staining with a low, medium, or high intensity MDA-MB-436 xenograft tumors was determined.

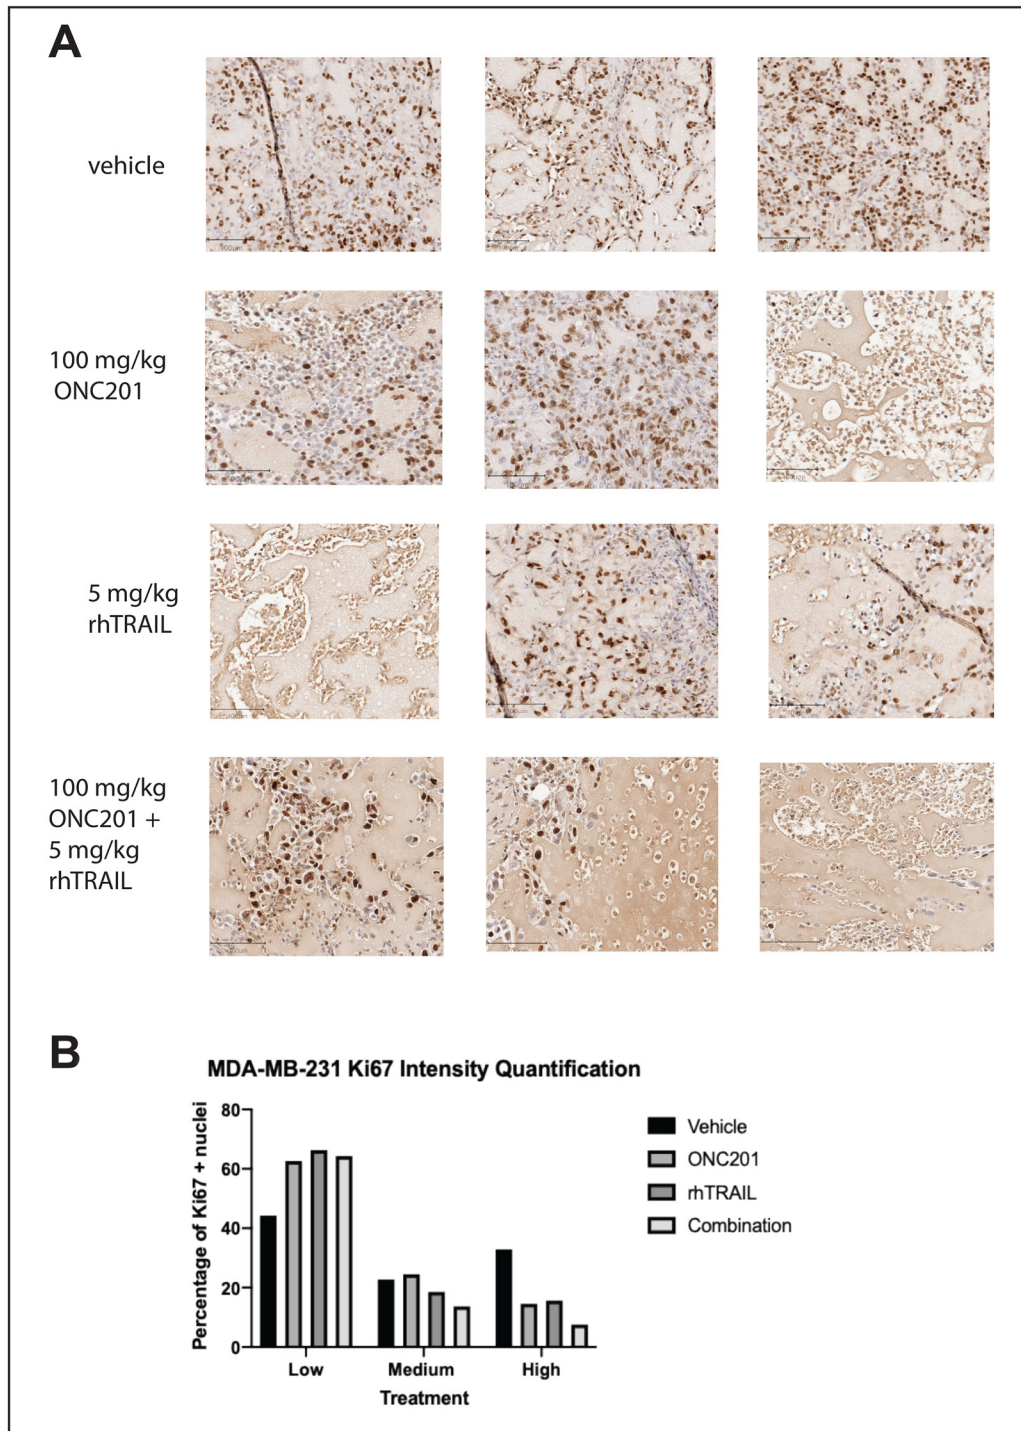

**Supplementary Figure 8: Ki67 staining in MDA-MB-231.** (A) Mice bearing MDA-MB-231 xenograft tumors were treated with a vehicle control, 100 mg/kg ONC201 orally, 5 mg/kg rhTRAIL intravenously, or a combination of ONC201 and rhTRAIL for one cycle. 24 hours after final TRAIL dose tumor sections were fixed and stained for Ki67. (B) Percentage of Ki67 positive nuclei staining with a low, medium, or high intensity MDA-MB-231 xenograft tumors was determined.



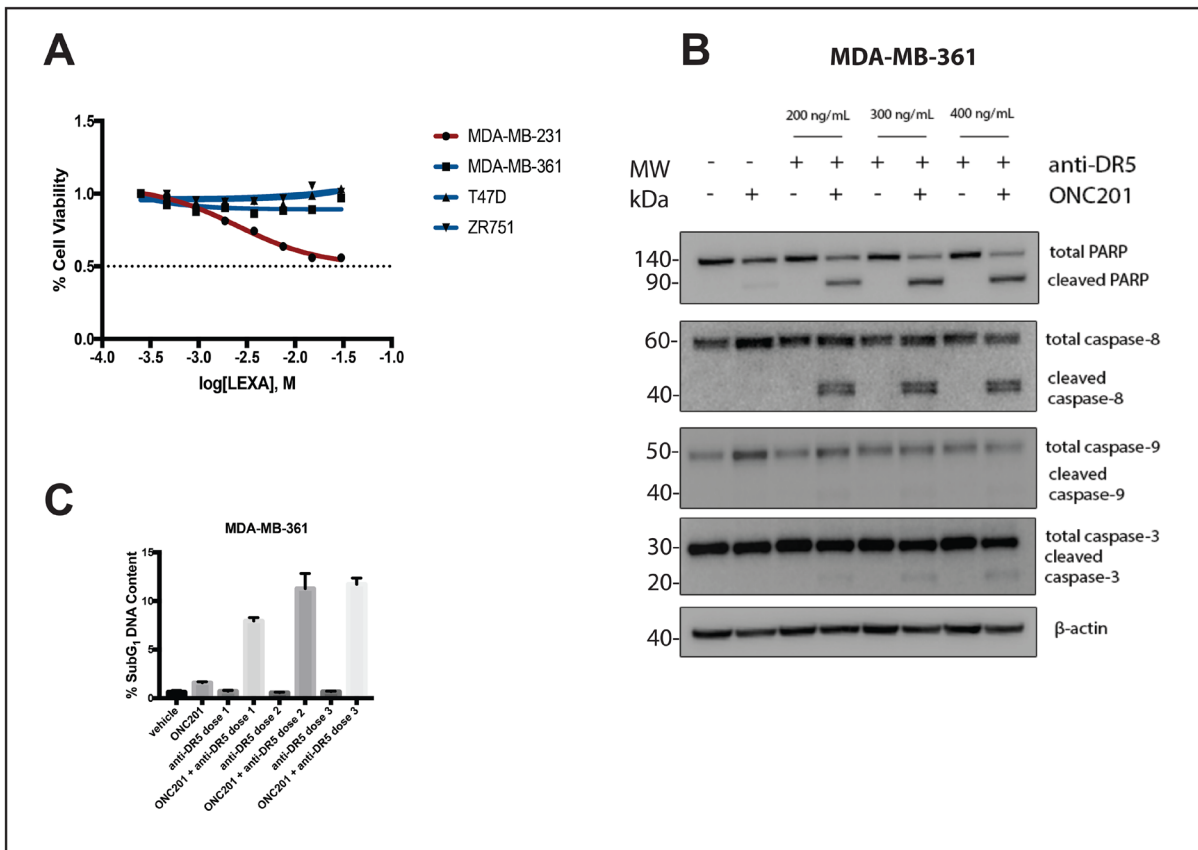

**Supplementary Figure 9: A DR5-agonistic antibody can also be used to convert the response of other breast cancer cells from anti-proliferative to pro-apoptotic.** (A) Breast cancer cells were treated with a vehicle control or increasing concentrations of anti-DR5 antibody lextatumumab for 72 hours. (B) MDA-MB-361 cells were treated as with a vehicle control or GI<sub>50</sub> doses of ONC201 for 72 hours. Lextatumumab was added for 4 hours and the induction of cell death was assessed using western blot. (C) MDA-MB-361 cells were treated as above and stained with propidium iodide. Flow cytometric analysis of the cells was used to determine the percentage of cells with subG<sub>1</sub> DNA content.

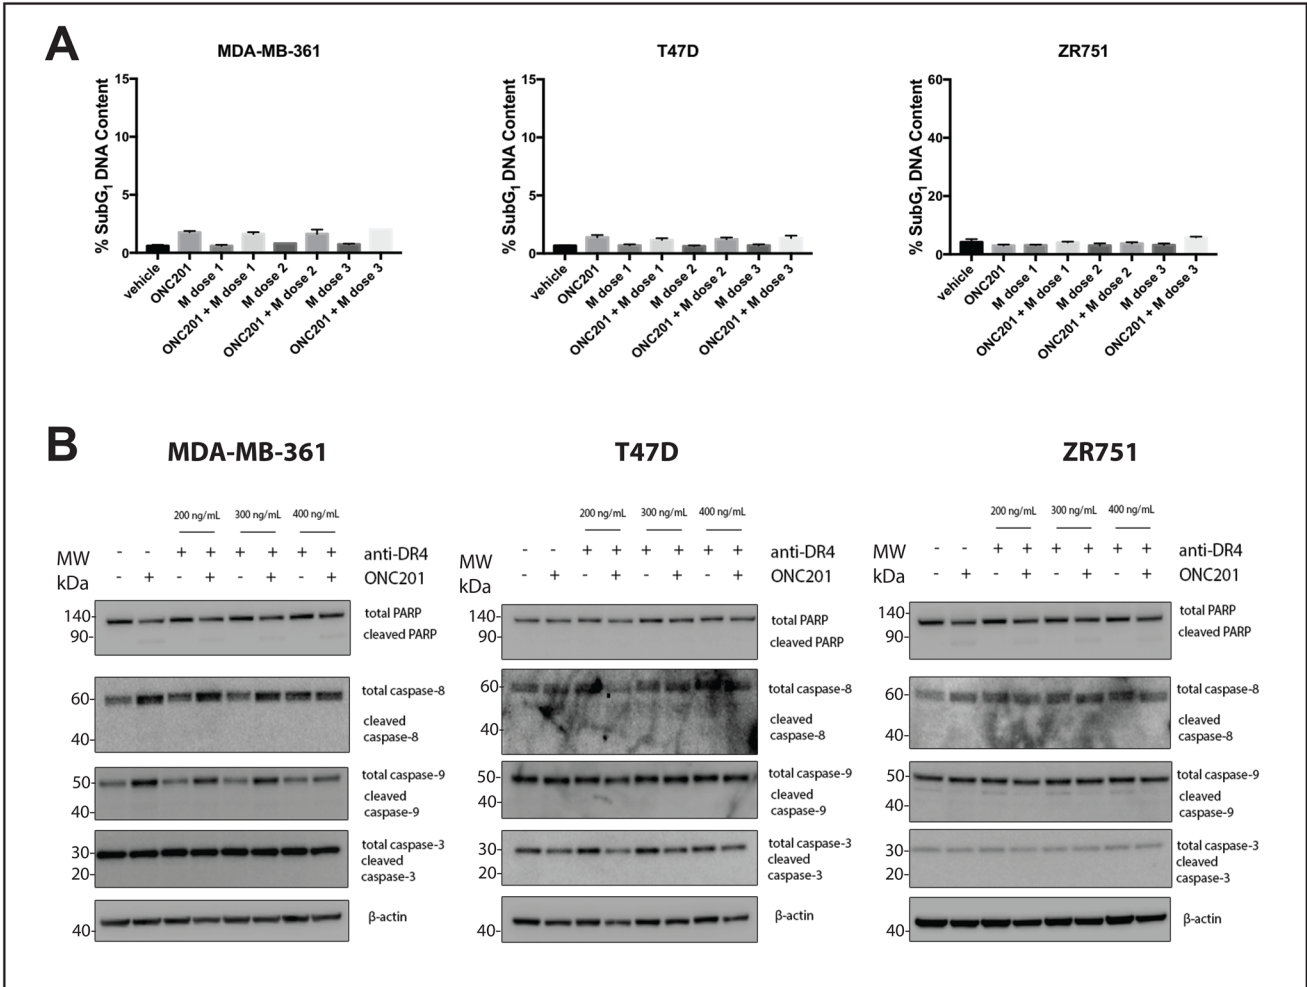

**Supplementary Figure 10: A DR4-agonistic antibody does not convert the response of breast cancer cells from anti-proliferative to pro-apoptotic.** (A) Breast cancer cells were treated with a vehicle control or increasing concentrations of anti-DR4 antibody mapatumumab for 72 hours and stained with propidium iodide. Flow cytometric analysis of the cells was used to determine the percentage of cells with subG<sub>1</sub> DNA content. (B) Breast cancer cells were treated as with a vehicle control or GI<sub>50</sub> doses of ONC201 for 72 hours. Mapatumumab was added for 4 hours and the induction of cell death was assessed using western blot.
